# Supplementary material for: A new approach to fabricate the Mn(ii)-based magnetic refrigerant through incorporation of a diamagnetic {LiO4} spacer
Source: Royal Society of Chemistry journal article supplement (doi:10.1039/c7dt04820c), 2018-01-01
Supplement: c7dt04820c1.pdf [file c7dt04820c1.pdf]

*Supporting Information:*

## **A new approach to fabricate the Mn(II)-based magnetic refrigerant through incorporation of diamagnetic {LiO<sub>4</sub>} spacer**

Jia-Wei Wu, <sup>a,b</sup> Xue Wang, <sup>c</sup> Chong-Bin Tian, <sup>\*a</sup> Shao-Wu Du<sup>\*a</sup>

<sup>a</sup> State Key Laboratory of Structural Chemistry, Fujian Institute of Research on the Structure of Matter, Chinese Academy of Sciences, Fujian, Fuzhou 350002, P. R. China. E-mail: tianchongbin@fjirsm.ac.cn; swdu@fjirsm.ac.cn.

<sup>b</sup> University of Chinese Academy of Sciences, Beijing 100049, P. R. China.

<sup>c</sup> Yantai Branched Center of Shandong Technology Transfer Center, Chinese Academy of Sciences, Shandong, Yantai 264000, P. R. China.

### **Contents**

#### **1. Experimental Section**

1.1 Materials and Physical Measurements

1.2 Synthesis of the Compound

1.3 Crystal Structure Analysis

#### **2. Results and Discussion**

2.1 IR Spectroscopic Analysis

2.2 Magnetic Susceptibility Analysis

#### **3. Tables and Figures**

**Table S1.** Crystallographic data for **1**.

**Table S2.** Selected bond lengths (Å) and angles (°) for **1**.

**Table S3.** The  $-\Delta S_m$  of **1** and 3d-based compounds.

**Figure S1.** View of the  $-\text{Mn}-\text{Li}_2-\text{Mn}-\text{Li}_2-$  chain in **1**.

**Figure S2.** View of the 6-connected topological network of **1**.

**Figure S3.** The PXRD of compound **1**.

**Figure S4.** TG curve of compound **1**.

**Figure S5.** The IR spectrum of compound **1**.

## 1. Experiment Section

### 1.1 Materials and Physical Measurements

All the materials were purchased from the commercial sources and used without any further purification. Thermogravimetric (TG) analysis was performed using a GA/NETZSCH STA449C instrument heated from room temperature to 800°C. Elemental analyses (C, H and N) were carried out with a Vario EL III analyzer. The IR spectrum of **1** was measured on Perkin-Elmer FT-IR spectrometer with KBr pellets in the range 4000–500 cm<sup>-1</sup>. The X-ray powder diffraction (XPRD) spectrum was collected using Miniflex II (Cu-K $\alpha$  radiation:  $\lambda = 1.54056 \text{ \AA}$ ) in the range of  $5^\circ < 2\theta < 60^\circ$ . The magnetic susceptibility was measured with a Quantum Design PPMS–9T system. Diamagnetic corrections were estimated by using Pascal's constants and background corrections by experimental measurement on sample holders.

### 1.2 Synthesis of the Compound

A mixture of Mn(CH<sub>3</sub>COO)<sub>2</sub>·4H<sub>2</sub>O (0.25 mmol, 61 mg), isophthalic acid (H<sub>2</sub>ip, 0.50 mmol, 84 mg) and LiOH (0.5 mmol, 12 mg) was kept in a 20 mL of Teflon-lined stainless steel vessel with 6 mL isopropanol and 8 drops of glacial acetic acid were added. After stirred for about 10 minutes, the mixture was heated to 120°C. After being maintained for 72 h, the reaction vessel was cooled to room temperature in another 72 h. Colorless rod-like crystal of **1** were obtained. Yield: 92.0 mg (85% based on Mn). Anal. Calcd for C<sub>16</sub>H<sub>12</sub>Li<sub>2</sub>MnO<sub>10</sub>: C 44.33, H 2.77; found: C 44.18, H 2.86. IR (KBr, cm<sup>-1</sup>): 3465 m, 1618 vs, 1553 vs, 1445 m, 1400 vs, 1268 vs, 1170 vs, 1075 s, 1020 vs, 925 vs, 838 s, 733 vs, 565 s, 519 vs.

### 1.3 Crystal Structure Analysis

X-ray single-crystal diffraction data were collected on Rigaku 724 CCD area-detector Diffractometer with a graphite monochromator utilizing Mo K $\alpha$  radiation ( $\lambda = 0.71073 \text{ \AA}$ ). CrystalClear software was used for data reduction and empirical absorption correction. The structure was solved by direct methods using SHELXS-97<sup>1</sup> and refined by full-matrix least-squares on  $F^2$  using *SHELX-2016* program<sup>2</sup>. All the non-hydrogen atoms were refined anisotropically. The hydrogen atoms bonded to carbon were generated geometrically (C–H 0.97 or 0.93  $\text{\AA}$ ) and U(H) values set as 1.2

times Ueq(C). A summary of crystal data and structure refinements of **1** is provided in Table S1. Selected bond lengths and angles are given in Table S2.

## 2. Results and Discussion.

### 2.1 IR Spectroscopic Analysis

In the IR spectrum of **1** (Fig. S5, ESI<sup>†</sup>), the peak observed at 3467 cm<sup>-1</sup> suggests the presence of water molecules. On the other hand, the presence of carboxylate is proved by three obvious signals at about 1622, 1558, and 1398 cm<sup>-1</sup>. The strong bands at 750 cm<sup>-1</sup> indicate the meta-substitution of carboxyl groups in the benzene ring of the H<sub>2</sub>ip ligand.

### 2.2 Magnetic Susceptibility Analysis:

The analysis of the magnetic data for 1D regular Mn(II) chain was performed based on the Hamiltonian  $H = -J\sum S_i S_{i+1}$  ( $J$  stands for the exchange constant between the adjacent Mn(II) ions and  $S_i$  are the classical spin vectors), and the magnetic susceptibility can be written as  $\chi_m = [Ng^2\beta^2 S(S+1)/3KT][(1 + (\coth(JS(S+1)/KT) - KT/JS(S+1)))/(1 - (\coth(JS(S+1)/KT) - KT/JS(S+1)))]$ .

### 3. Tables and Figures.

**Table S1.** Crystallographic data for **1**.

| <b>1</b>                                                                             |                                                                   |
|--------------------------------------------------------------------------------------|-------------------------------------------------------------------|
| formula                                                                              | C <sub>16</sub> H <sub>12</sub> MnLi <sub>2</sub> O <sub>10</sub> |
| formula mass                                                                         | 433.08                                                            |
| crystal system                                                                       | Monoclinic                                                        |
| space group                                                                          | C2/c                                                              |
| <i>a</i> /Å                                                                          | 16.390(6)                                                         |
| <i>b</i> /Å                                                                          | 10.753(4)                                                         |
| <i>c</i> /Å                                                                          | 10.349(4)                                                         |
| $\alpha$ /°                                                                          | 90.00                                                             |
| $\beta$ /°                                                                           | 111.528(5)                                                        |
| $\gamma$ /°                                                                          | 90.00                                                             |
| <i>V</i> /Å <sup>3</sup>                                                             | 1696.8(11)                                                        |
| <i>Z</i>                                                                             | 4                                                                 |
| D <sub>calc</sub> /g cm <sup>-3</sup>                                                | 1.695                                                             |
| $\mu$ /mm <sup>-1</sup>                                                              | 4.943                                                             |
| F(000)                                                                               | 876.0                                                             |
| Parameters                                                                           | 126                                                               |
| <i>R</i> <sub>1</sub> <sup>a</sup> , <i>wR</i> <sub>2</sub> <sup>b</sup> [I > 2σ(I)] | 0.0348/0.0840                                                     |
| <i>R</i> <sub>1</sub> <sup>a</sup> , <i>wR</i> <sub>2</sub> <sup>b</sup> [all data]  | 0.0392/0.0866                                                     |
| GOF on <i>F</i> <sup>2</sup>                                                         | 1.039                                                             |

$${}^a R_1 = \sum \|F_o\| - \|F_c\| / \sum \|F_o\|, \quad {}^b wR_2 = [\sum w(F_o^2 - F_c^2)^2 / \sum w(F_o^2)^2]^{0.5}.$$

**Table S2.** Selected bond lengths (Å) and angles (°) for **1**.

|              |            |            |            |
|--------------|------------|------------|------------|
| Mn1–O3B      | 2.2167(17) | Mn1–O3C    | 2.2167     |
| Mn1O1        | 2.2361(14) | Mn1–O1A    | 2.2361(14) |
| Mn1–O2       | 2.4064(15) | Mn1–O2A    | 2.4064(15) |
| Li1–O2       | 1.923(4)   | Li1–O3E    | 1.957(4)   |
| Li1–O1F      | 1.959(4)   | Li1–O5     | 1.977(4)   |
| Mn1–O1       | 2.2361(14) | Mn1–O1A    | 2.2361(14) |
| Mn1–O2       | 2.4064(15) | Mn1–O2A    | 2.4064(15) |
| Li1D–O1–Mn1  | 95.77(12)  | Li1–O2–Mn1 | 118.46(13) |
| Li1H–O3–Mn1G | 96.45(13)  |            |            |

Symmetry codes: (A) 1 – *x*, + *y*, – 1/2 – *z*; (B) 1/2 – *x*, – 1/2 + *y*, – 1/2 – *z*; (C) 1/2 + *x*, – 1/2 + *y*, + *z*; (D) + *x*, – *y*, – 1/2 + *z*; (E) 1/2 + *x*, 1/2 – *y*, 1/2 + *z*; (F) + *x*, – *y*, 1/2 + *z*; (G) – 1/2 + *x*, 1/2 – *y*, – 1/2 + *z*; (H) – 1/2 + *x*, 1/2 – *y*, – 1/2 + *z*;

**Table S3.** The  $-\Delta S_m$  of **1** and 3d-based compounds.

| complexes                                                                                                                                                                                                                   | $-\Delta S_m(\text{J kg}^{-1} \text{K}^{-1})$ | T(K) | $\Delta H(\text{T})$ | Ref       |
|-----------------------------------------------------------------------------------------------------------------------------------------------------------------------------------------------------------------------------|-----------------------------------------------|------|----------------------|-----------|
| $[\text{Mn}^{\text{II}}(\text{glc})_2(\text{H}_2\text{O})_2]$                                                                                                                                                               | 60.3                                          | 1.8  | 7                    | 3         |
| $[\text{NH}_3\text{CH}_3][\text{CrMn}(\text{HCOO})_6]$                                                                                                                                                                      | 48.2                                          | 2    | 7                    | 4         |
| $[\text{CH}_3\text{NH}_2\text{CH}_3][\text{CrMn}(\text{HCOO})_6]$                                                                                                                                                           | 43.93                                         | 2    | 7                    | 5         |
| $[\text{Mn}(\text{Me-ip})(\text{DMF})]_n$                                                                                                                                                                                   | 42.4                                          | 2    | 8                    | 6         |
| <b>1</b>                                                                                                                                                                                                                    | 30.4                                          | 2    | 8                    | This work |
| $[\text{Fe}_2(\text{L})_2](\text{BF}_4)_2 \cdot 2(\text{H}_2\text{O})$                                                                                                                                                      | 27.7                                          | 3    | 7                    | 6         |
| $[\text{Fe}_2(\text{L})_2](\text{Cl})_2 \cdot 2(\text{CH}_3\text{OH}) \cdot 4(\text{H}_2\text{O})$                                                                                                                          | 26.5                                          | 3    | 7                    | 6         |
| $[\text{Mn}^{\text{III}}_6\text{Mn}^{\text{II}}_8(\text{OH})_2(\text{Hpeol})_4(\text{H}_2\text{peol})_6\text{I}_4(\text{EtOH})_6]\text{I}_4$                                                                                | 25                                            | 3.8  | 7                    | 7         |
| $[\text{Fe}_2(\text{L})_2](\text{NO}_3)_2 \cdot 3(\text{CH}_3\text{OH}) \cdot 2(\text{H}_2\text{O})$                                                                                                                        | 24.1                                          | 3    | 7                    | 6         |
| $[\text{Fe}_2(\text{L})_2](\text{ClO}_4)(\text{Cl}) \cdot 4(\text{CH}_3\text{OH}) \cdot 2(\text{H}_2\text{O})$                                                                                                              | 22.9                                          | 3    | 7                    | 6         |
| $\text{Fe}^{\text{II}}_{14}\text{O}_6(\text{ta})_6(\text{OMe})_{18}\text{Cl}_6$                                                                                                                                             | 20.3                                          | 6    | 7                    | 8         |
| $[\text{Mn}^{\text{II}}_4(\text{N}_3)_{7.3}\text{Cl}_{0.7}(\text{dafo})_4]$                                                                                                                                                 | 19.3                                          | 4    | 5                    | 9         |
| $[\text{Mn}^{\text{II}}(\text{bipy})_3]_{1.5}[\text{Mn}^{\text{II}}_{24}\text{Mn}^{\text{IV}}_8(\text{thme})_{16}(\text{bipy})_{24}(\text{N}_3)_{12}(\text{OAc})_{12}(\text{ClO}_4)_{11}]$                                  | 18.2                                          | 1.6  | 7                    | 10        |
| $\text{Fe}^{\text{III}}_{14}\text{O}_6(\text{bta})_6(\text{OMe})_{18}\text{Cl}_6$                                                                                                                                           | 17.6                                          | 6    | 7                    | 11, 12    |
| $[\text{Mn}^{\text{III}}_6\text{Mn}^{\text{II}}_8(\text{OH})_2(\text{Hpeol})_4(\text{H}_2\text{peol})_6\text{I}_4(\text{EtOH})_6]\text{I}_4 \cdot 12\text{EtOH}$                                                            | 17.0                                          | 3.8  | 7                    | 7         |
| $\text{Fe}^{\text{III}}(\text{acetate})_3[9\text{-MC}_{\text{FeN}(\text{shi})\text{-3}}(\text{MeOH})_3 \cdot \text{MeOH} \cdot 7\text{H}_2\text{O}]$                                                                        | 15.4                                          | 3    | 7                    | 13        |
| $\{\text{Na}_2\text{Mn}^{\text{II}}(\text{SO}_4)_3(\text{OH})_3\}_n$                                                                                                                                                        | 14.4                                          | 13.5 | 7                    | 14        |
| $[\text{Mn}^{\text{II}}_{12}\text{O}_{12}(\text{CH}_3\text{COO})_{16}(\text{H}_2\text{O})_4] \cdot 2\text{CH}_3\text{COOH} \cdot 4\text{H}_2\text{O}$                                                                       | 13.8                                          | 13.8 | 5                    | 15        |
| $[\text{Mn}^{\text{III}}_{11}\text{Mn}^{\text{II}}_6\text{O}_8\text{Cl}_4(\text{dmp})_{10}(\text{OAc})_{2.66}\text{Cl}_{2.34}(\text{py})_3(\text{MeCN})_2] \cdot 7\text{MeCN}$                                              | 13.3                                          | 5.2  | 9                    | 16        |
| $\{[\text{Co}^{\text{II}}_5(\text{Me-ip})_4(\text{Me-Hip})_2(\text{H}_2\text{O})_4] \cdot 6\text{H}_2\text{O}\}_n$                                                                                                          | 13.2                                          | 4.0  | 8                    | 17        |
| $[\text{Mn}^{\text{III}}_6\text{Mn}^{\text{II}}_4(\text{OH})_6(\text{amp})_4(\text{ampH})_4\text{I}_4(\text{EtOH})_4]\text{I}_4 \cdot 12\text{EtOH}$                                                                        | 13.0                                          | 2.2  | 7                    | 9, 18     |
| $[\text{Mn}^{\text{III}}_6\text{Mn}^{\text{II}}_4\text{O}_4(\text{mptH})_6(\text{N}_3)_3\text{Br}_2](\text{N}_3)_{0.7}\text{Br}_{0.3} \cdot 3\text{MeCN} \cdot 2\text{MeOH}$                                                | 10.3                                          | 2.6  | 9                    | 16        |
| $[\text{Na}_2\text{Mn}^{\text{III}}_{11}\text{Mn}^{\text{II}}_4\text{O}_8(\text{hmpH})_{10}(\text{OAc})_2(\text{H}_2\text{O})_2(\text{MeO})_{1.5}(\text{N}_3)_{2.5}(\text{OAc})_{10}\text{H}_2\text{O} \cdot 2\text{MeOH}]$ | 9.5                                           | 6    | 7                    | 18        |
| $[\text{Mn}^{\text{III}}_{12}\text{Mn}^{\text{II}}_7\text{O}_8(\text{hmpH})_{12}(\text{N}_3)_3(\text{MeO})_{5.5}(\text{MeOH})_{3.5}(\text{H}_2\text{O})_{1.5}]$                                                             | 9.0                                           | 9    | 7                    | 18        |

|                                                                                                                         |      |      |   |    |
|-------------------------------------------------------------------------------------------------------------------------|------|------|---|----|
| (OH) <sub>0.5</sub> ](OAc)·10H <sub>2</sub> O                                                                           |      |      |   |    |
| [Mn <sup>III</sup> <sub>12</sub> Mn <sup>II</sup> <sub>7</sub> O <sub>8</sub> (bhmmp) <sub>12</sub>                     | 8.9  | 4.2  | 7 | 18 |
| (MeCN) <sub>6</sub> ]Cl <sub>2</sub> ·10MeOH.MeCN                                                                       |      |      |   |    |
| [Fe <sup>III</sup> <sub>17</sub> O <sub>16</sub> (OH) <sub>12</sub> (py) <sub>12</sub> Br <sub>4</sub> ]Br <sub>3</sub> | 8.9  | 2.7  | 7 | 19 |
| Fe <sup>III</sup> (benzoate) <sub>3</sub> [9-MC <sub>FeN</sub> (shi)-3]                                                 | 7.4  | 7    | 7 | 13 |
| (MeOH) <sub>3</sub> ·MeOH·4H <sub>2</sub> O                                                                             |      |      |   |    |
| [Mn <sup>II</sup> (glc) <sub>2</sub> ] <sub>n</sub>                                                                     | 6.9  | 7.0  | 7 | 3  |
| NiCl <sub>2</sub> (bipy)                                                                                                | 6    | 7    | 7 | 20 |
| [Mn <sup>III</sup> <sub>8</sub> Mn <sup>IV</sup> <sub>4</sub> O <sub>12</sub> (2-ClPhCO <sub>2</sub> ) <sub>16</sub>    | 4.3  | ~2.5 | 3 | 21 |
| (H <sub>2</sub> O) <sub>4</sub> ]CH <sub>2</sub> Cl <sub>2</sub> ·5H <sub>2</sub> O                                     |      |      |   |    |
| {Co <sup>II</sup> <sub>4</sub> (OH) <sub>2</sub> (SBA) <sub>3</sub> } <sub>n</sub>                                      | 2.4  | 10   | 5 | 22 |
| [Mn <sup>II</sup> <sub>3</sub> (OH) <sub>2</sub> (tdc) <sub>2</sub> ] <sub>n</sub>                                      | <1.7 | 25   | 5 | 23 |

Abbreviation: glc = glycolates; H<sub>2</sub>Me-ip = 5-methylisophthalic acid; H<sub>2</sub>L = N'1,N'4-bis(2-hydroxybenzylidene)succinohydrazide; H<sub>2</sub>peol = pentaerythritol; taH = 1,2,3-triazole; dafo = 4,5-diazafluoren-9-one; bipy = bipyridyl; thme = methyl-hexane; bta = benzotriazole; H<sub>2</sub>dmp = 2,2-dimethyl-1,3-propanediol; py = pyridine; H<sub>2</sub>amp = 1,3-propanediol; H<sub>3</sub>mpt = 3-methylpentan-1,3,5-triol; H<sub>3</sub>hmp = 2,6-bis(hydroxymethyl)-4-methylpheno; bhmmp = 2,6-bis(hydroxymethyl)-4-methylphenol; SBA = sebacic acid; tdc = thiophene-2,5-dicarboxylic acid.

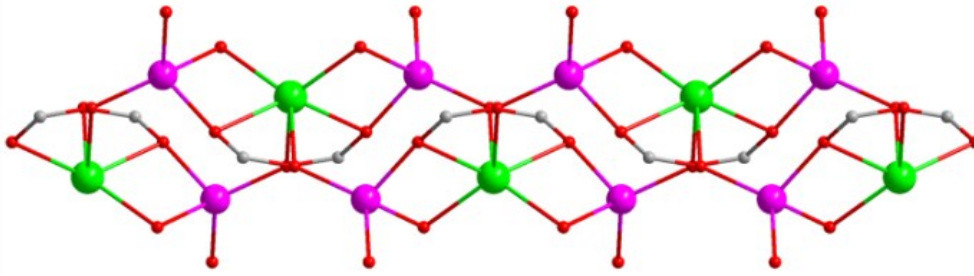

**Figure S1.** View of the  $-\text{Mn-Li}_2\text{-Mn-Li}_2-$  chain in **1**.

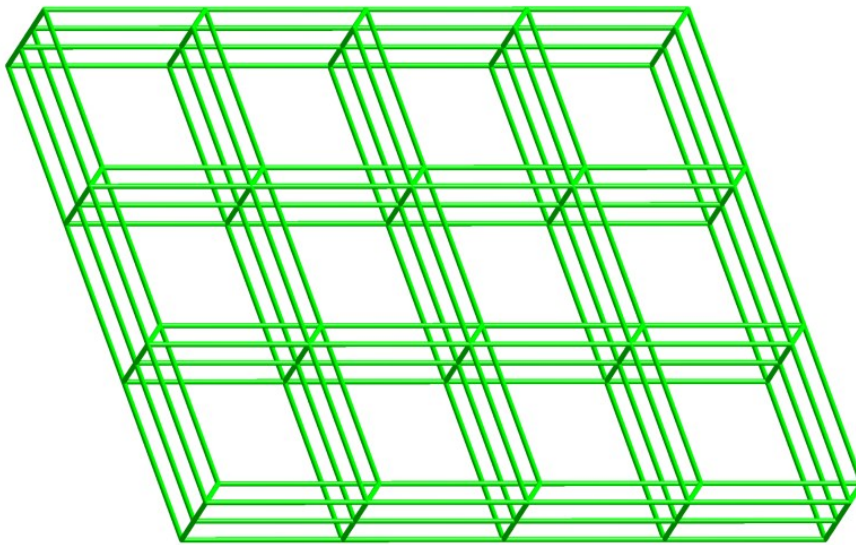

**Figure S2.** View of the 6-connected topological network of **1**.

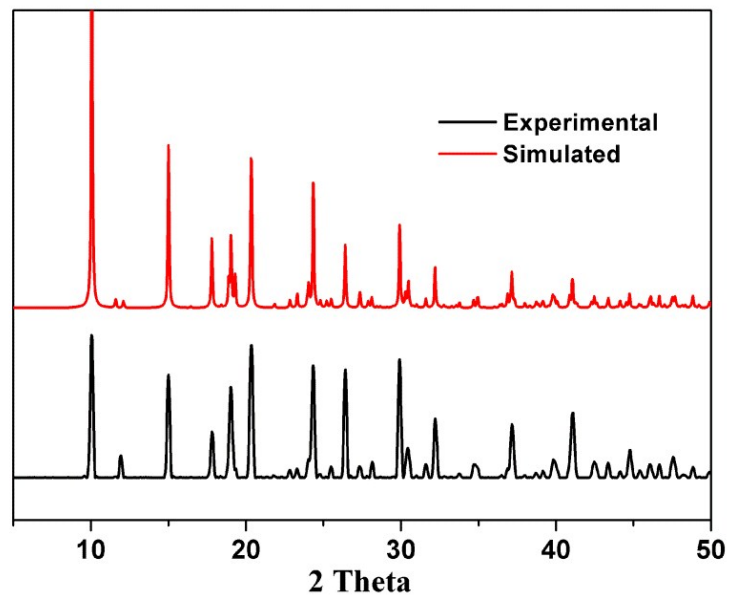

**Figure S3.** The PXRD of **1**.

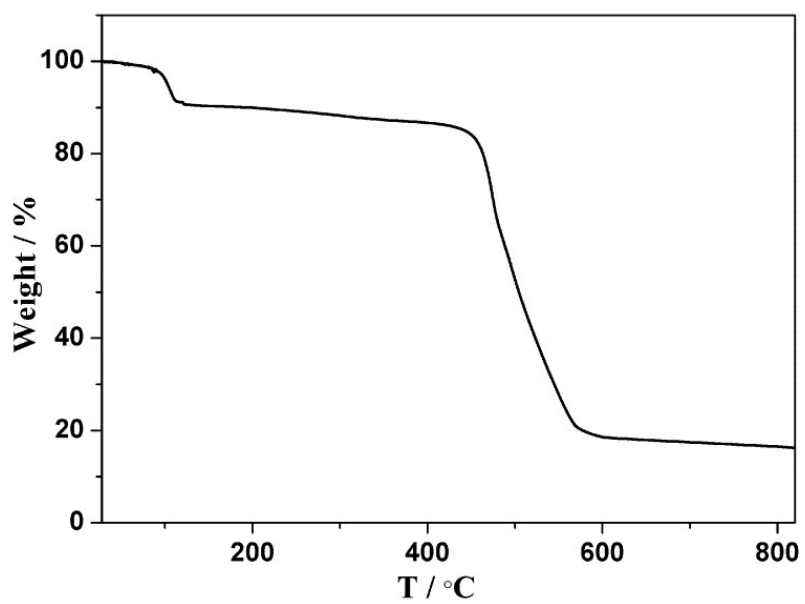

**Figure S4.** The TG curve of compound 1.

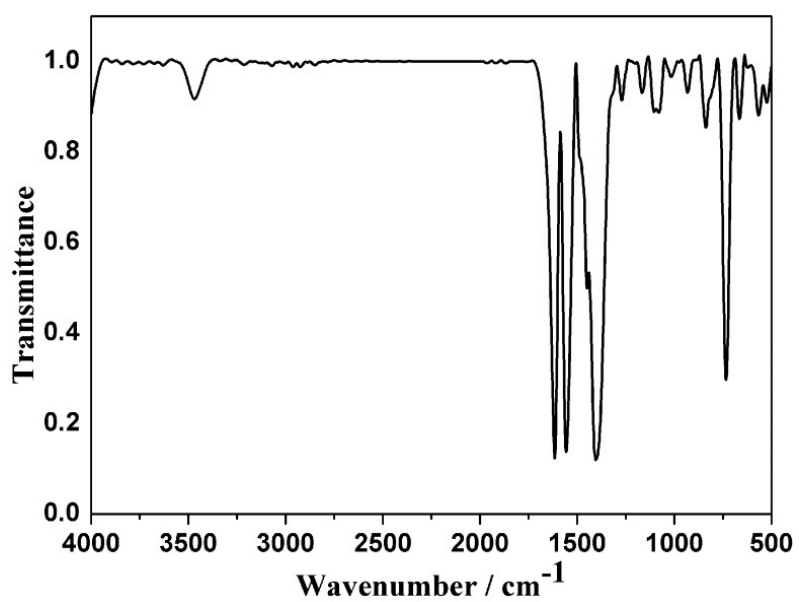

**Figure S5.** The IR spectrum of compound 1.



## References:

1. G. M. Sheldrick, SHELXS 97, Program for Crystal Structure Solution, University of Gottingen, Gottingen, Germany, 1997.
2. G. M. Sheldrick, *Acta Crystallogr., Sect. C.*, 2015, **71**, 3.
3. Y.-C. Chen, F.-S. Guo, J.-L. Liu, J.-D. Leng, P. Vrabel, M. Orendac, J. Prokleska, V. Sechovsky and M.-L. Tong, *Chem. Eur. J.*, 2014, **20**, 3029.
4. J.-P. Zhao, S.-D. Han, X. Jiang, S.-J. Liu, R. Zhao, Z. Chang and X.-H. Bu, *Chem. Commun.*, 2015, **51**, 8288.
5. C. B. Tian, R. P. Chen, C. He, W. J. Li, Q. Wei, X. D. Zhang and S. W. Du, *Chem. Commun.*, 2014, **50**, 1915.
6. A. Adhikary, H. S. Jena and S. Konar, *Dalton Trans.*, 2015, **44**, 15531.
7. M. Manoli, A. Collins, S. Parsons, A. Candini, M. Evangelisti and E. K. Brechin, *J. Am. Chem. Soc.*, 2008, **130**, 11129.
8. R. Shaw, R. H. Laye, L. F. Jones, D. M. Low, C. Talbot-Eeckelaers, Q. Wei, C. J. Milios, S. Teat, M. Helliwell, J. Raftery, M. Evangelisti, M. Affronte, D. Collison, E. K. Brechin and E. J. L. McInnes, *Inorg. Chem.*, 2007, **46**, 4968.
9. J.-P. Zhao, R. Zhao, Q. Yang, B.-W. Hu, F.-C. Liu and X.-H. Bu, *Dalton Trans.*, 2013, **42**, 14509.
10. M. Evangelisti, A. Candini, M. Affronte, E. Pasca, L. J. de Jongh, R. T. W. Scott and E. K. Brechin, *Phys. Rev. B*, 2009, **79**, 104414.
11. M. Evangelisti, A. Candini, A. Ghirri, M. Affronte, E. K. Brechin and E. J. L. McInnes, *Appl. Phys. Lett.*, 2005, **87**, 072541.
12. M. Evangelisti, A. Candini, A. Ghirri, M. Affronte, S. Piligkos, E. K. Brechin and E. J. L. McInnes, *Polyhedron*, 2005, **24**, 2573.
13. C. Y. Chow, R. Guillot, E. Riviere, J. W. Kampf, T. Mallah and V. L. Pecoraro, *Inorg. Chem.*, 2016, **55**, 10238.
14. H.-C. Hu, C.-S. Cao, Y. Yang, P. Cheng and B. Zhao, *J. Mater. Chem. C*, 2015, **3**, 3494.
15. M. Balanda, R. Pelka, M. Fitta, L. Laskowski and M. Laskowska, *Rsc Advances*, 2016, **6**, 49179.
16. S. Nayak, M. Evangelisti, A. K. Powell and J. Reedijk, *Chem. Eur. J.*, 2010, **16**, 12865.
17. C. Tian, Z. Lin and S. Du, *Cryst. Growth. Des.*, 2013, **13**, 3746.
18. J.-L. Liu, J.-D. Leng, Z. Lin and M.-L. Tong, *Chem.-Asian J.*, 2011, **6**, 1007.
19. I. A. Gass, E. K. Brechin and M. Evangelisti, *Polyhedron*, 2013, **52**, 1177.
20. K. Raczova, E. Cizmar and A. Feher, *Acta Phys. Pol. A*, 2017, **131**, 922.
21. F. Torres, X. Bohigas, J. M. Hernandez and J. Tejada, *J. Phys.-Condens. Mat.*, 2003, **15**, L119.
22. R. Sibille, T. Mazet, B. Malaman, T. Gaudisson and M. Francois, *Inorg. Chem.*, 2012, **51**, 2885.
23. R. Sibille, T. Mazet, E. Elkaim, B. Malaman and M. Francois, *Inorg. Chem.*, 2013, **52**, 608.
